# Supplementary material for: Trace Elements and Minerals in Fumarolic Sulfur: The Case of Ebeko Volcano, Kuriles
Source: Hindawi journal article supplement (doi:10.1155/2018/4586363), 2018-01-01
Supplement: f1 [file 4586363.f1.doc]

**Supplementary Table 1.** Used standards for EDS analysis

| Element | Standard |
| --- | --- |
| Ag | Ag metal |
| Al | Al2O3 |
| As | InAs |
| Au | Au metal |
| Ba | BaF2 |
| Bi | Bi metal |
| Br | KBr |
| Ca | Wollastonite |
| Cd | Cd metal |
| Cl | NaCl |
| Cr | Cr metal |
| Cu | Cu metal |
| Fe | Fe metal |
| Ge | Ge metal |
| Hg | HgTe |
| I | AgI |
| In | InAs |
| K | Orthoclase |
| Mg | MgO |
| Mn | Mn metal |
| Na | Albite |
| Ni | Ni metal |
| P | LaPO4 |
| Pb | Pb metal |
| Pd | Pd metal |
| S | FeS2 |
| Sb | Sb native |
| Se | Se metal |
| Si | SiO2 |
| Te | Te metal |
| Ti | Ti metal |
| Tl | TlInTe2 |
| Zn | Zn metal |
| Zr | Zr metal |

**Supplementary Table 2. detection limits for ICP-AES analysis, ppm**

| Element | l.d. | Element | l.d. |
| --- | --- | --- | --- |
| Ag | 0.002 | Na | 0.005 |
| Ag | 0.002 | Nb | 0.01 |
| Al | 0.05 | Ni | 0.003 |
| As | 0.01 | P | 0.03 |
| B | 0.003 | Pb | 0.03 |
| Ba | 0.0005 | Rb | 0.1 |
| Be | 0.0003 | Sb | 0.05 |
| Bi | 0.01 | Se | 0.01 |
| Ca | 0.003 | Si | 0.01 |
| Ca | 0.003 | Sn | 0.05 |
| Cd | 0.003 | Sr | 0.0005 |
| Co | 0.002 | Ta | 0.05 |
| Cr | 0.003 | Ti | 0.0005 |
| Cu | 0.001 | V | 0.003 |
| Fe | 0.005 | V | 0.003 |
| Ga | 0.05 | W | 0.05 |
| K | 0.05 | W | 0.05 |
| Li | 0.002 | Zn | 0.001 |
| Mg | 0.003 | Zn | 0.001 |
| Mn | 0.0005 | Zr | 0.003 |
| Mo | 0.01 | Zr | 0.003 |

**Supplementary Table 3. Compositions of Ebeko andesites**

| Element/oxide | S22 | S24 | S28 | S30 | S32 | S34a | S39 | S49 | S54a | S57 | S66a | S66 | Average | RSD, % |
| --- | --- | --- | --- | --- | --- | --- | --- | --- | --- | --- | --- | --- | --- | --- |
|  | Wt. % | | | | | | | | | | | |  |  |
| SiO2 | 58.3 | 49.7 | 58.6 | 58.8 | 61.8 | 60.4 | 60.8 | 60 | 57.5 | 57.5 | 57 | 57.7 | 58.2 | 5.3 |
| TiO2 | 0.65 | 0.92 | 0.61 | 0.61 | 0.53 | 0.61 | 0.57 | 0.54 | 0.70 | 0.72 | 0.65 | 0.66 | 0.65 | 16 |
| Al2O3 | 17 | 19.4 | 16.7 | 16.7 | 16.7 | 16.6 | 16.9 | 16.4 | 17.3 | 17.7 | 17.7 | 17.5 | 17.2 | 4.7 |
| Fe2O3 | 8.38 | 10.35 | 7.65 | 7.54 | 6.62 | 7.55 | 7.1 | 7.42 | 7.85 | 7.89 | 8.71 | 8.51 | 8.0 | 12 |
| MnO | 0.17 | 0.2 | 0.16 | 0.16 | 0.16 | 0.16 | 0.21 | 0.16 | 0.16 | 0.16 | 0.18 | 0.18 | 0.17 | 10 |
| MgO | 3.2 | 4.35 | 3.98 | 3.73 | 2.34 | 2.76 | 2.56 | 3.08 | 3.9 | 3.19 | 3.54 | 3.39 | 3.3 | 18 |
| CaO | 6.56 | 10.2 | 6.84 | 7.04 | 5.63 | 6.15 | 5.85 | 5.78 | 7.12 | 6.46 | 7.44 | 7.31 | 6.9 | 18 |
| Na2O | 3.03 | 2.86 | 3.11 | 3.11 | 3.4 | 3.07 | 3.39 | 3.13 | 3.35 | 3.38 | 2.98 | 3.03 | 3.2 | 5.8 |
| K2O | 2.28 | 1.43 | 2.2 | 2.21 | 2.58 | 2.54 | 2.49 | 2.48 | 2.09 | 2.03 | 1.99 | 2.08 | 2.2 | 15 |
| P2O5 | 0.18 | 0.23 | 0.17 | 0.18 | 0.18 | 0.17 | 0.20 | 0.16 | 0.23 | 0.23 | 0.18 | 0.19 | 0.19 | 12 |
| LOI | 0.63 | 0.54 | 0.15 | 0.17 | 0.2 | 0 | 0.17 | 1.08 | 0 | 0.66 | 0.23 | 0.33 | 0.35 | 92 |
| Total | 100.4 | 100.3 | 100.2 | 100.3 | 100.2 | 100 | 99.9 | 100.3 | 100.2 | 100 | 100.2 | 100.3 | 100.2 | 0.2 |
|  | ppm | | | | | | | | | | | |  |  |
| BaO | 412 | 305 | 457 | 421 | 493 | 439 | 421 | 484 | 403 | 421 | 403 | 403 | 422 | 11 |
| V | 140 | 240 | 100 | 130 | 110 | 130 | 89 | 120 | 140 | 150 | 110 | 140 | 133 | 29 |
| Cr | 20 | l.d. | 48 | 45 | 20 | l.d. | l.d. | 100 | 99 | l.d. | 28 | l.d. | 51.4 | 67 |
| Ni | 19 | 24 | 35 | 36 | 18 | 21 | 21 | 36 | 33 | 23 | 20 | 24 | 25.8 | 27 |
| Cu | 85 | 72 | 190 | 66 | 52 | 63 | 77 | 69 | 56 | 60 | 69 | 75 | 77.8 | 47 |
| Zn | 69 | 65 | 57 | 62 | 56 | 72 | 62 | 72 | 59 | 73 | 68 | 68 | 65.3 | 9.2 |
| Ga | 12 | 12 | 12 | 15 | 13 | 14 | 13 | 16 | 13 | 16 | 15 | 14 | 13.8 | 11 |
| Ge | 2.3 | 3.5 | 1.6 | 2 | 2.3 | 2.1 | 2.5 | 1.7 | 1.4 | 3.1 | 3 | 2.5 | 2.3 | 27 |
| Br | 2.1 | l.d. | l.d. | 1.5 | 2.4 | 2.7 | l.d. | 2.1 | l.d. | l.d. | 1.8 | 0.7 | 1.9 | 35 |
| Rb | 49 | 23 | 42 | 46 | 54 | 56 | 51 | 55 | 36 | 41 | 40 | 41 | 44.5 | 21 |
| Sr | 360 | 480 | 370 | 400 | 390 | 360 | 380 | 370 | 390 | 400 | 390 | 400 | 391 | 8.1 |
| Y | 21 | 19 | 19 | 20 | 21 | 23 | 25 | 21 | 24 | 22 | 20 | 21 | 21.3 | 8.8 |
| Zr | 110 | 58 | 100 | 110 | 120 | 130 | 120 | 120 | 120 | 100 | 110 | 110 | 109 | 17 |
| Nb | 2.1 | 1.1 | 2.2 | 2.5 | 2.4 | 2.4 | 2.9 | 2.3 | 2.8 | 2.4 | 2.1 | 2 | 2.3 | 20 |
| Mo | 1.6 | 0.47 | 0.97 | 1.1 | 1.4 | 1.6 | 1.1 | 1.7 | 1 | 0.6 | 1.4 | 1.2 | 1.2 | 33 |
| Ag | 0.51 | 0.44 | 0.45 | 0.53 | 0.31 | 0.38 | 0.27 | 0.36 | 0.4 | 0.48 | 0.33 | 0.48 | 0.41 | 20 |
| Cd | 0.4 | 0.36 | 0.2 | 0.26 | 0.35 | 0.29 | 0.22 | 0.33 | l.d. | 0.31 | 0.37 | 0.35 | 0.31 | 20 |
| Sn | 1.4 | 1 | 0.96 | 0.95 | 1.2 | 2.1 | 5.3 | 2 | 1.3 | 1.1 | 1.3 | 1.2 | 1.7 | 73 |
| Sb | 0.48 | l.d. | 0.26 | 0.2 | 0.43 | 0.68 | 0.49 | 0.56 | 0.28 | l.d. | 0.48 | 0.29 | 0.4 | 37 |
| I | l.d. | l.d. | l.d. | l.d. | l.d. | l.d. | 0.34 | l.d. | l.d. | l.d. | l.d. | l.d. | 0.34 | l.d. |
| Cs | 1.8 | 0.88 | 1.5 | 2.3 | 2.1 | 2.5 | 0.9 | 2.5 | 1.3 | 0.55 | 1.3 | 2.5 | 1.7 | 42 |
| As | l.d. | l.d. | l.d. | l.d. | l.d. | 4.4 | l.d. | l.d. | l.d. | l.d. | l.d. | l.d. | 4.4 | l.d. |
| Pb | 12 | 2.2 | 6.2 | 8.4 | 9.9 | 11 | 7.8 | 12 | 4.9 | 4.1 | 9.4 | 10 | 8.2 | 39 |
| Th | 5.4 | 3.1 | 5.1 | 4.9 | 5.7 | 5.7 | 5.5 | 4.9 | 3.9 | 4.7 | 5 | 4.5 | 4.9 | 16 |
| U | 1.6 | l.d. | 1 | 2.1 | 1.7 | 1.4 | 2.1 | 2.4 | 1.6 | 1 | 1.4 | 1.6 | 1.6 | 27 |

*l.d. – below limit of detection

**Supplementary Table 4.** Solubility products of some low-soluble sulfides

| Compound | Ksp |
| --- | --- |
| PtS | 8.00E-68 |
| HgS (red) | 4.00E-53 |
| HgS (black) | 1.60E-52 |
| CuS | 6.30E-36 |
| GeS | 3.00E-35 |
| Ag2S | 6.30E-50 |
| Cu2S | 2.50E-48 |
| FeS2 | 6.30E-31 |
| In2S3 | 5.75E-74 |
| Bi2S3 | 6.30E-72 |
| CdS | 1.60E-28 |
| SnS | 2.50E-27 |
| PbS | 2.50E-27 |
| NiS | 2.00E-26 |
| CoS | 2.00E-25 |
| ZnS | 1.60E-24 |
| Sb2S3 | 2.90E-59 |
| As2S3 | 3.80E-59 |
| FeS | 5.00E-18 |
| Tl2S | 5.00E-21 |
| Fe2S3 | 1.00E-33 |
| MnS | 2.50E-13 |
